# Supplementary material for: Learning from lines: Critical COVID data visualizations and the quarantine quotidian
Source: PubMed Central journal article supplement — Big Data Soc. 2020 Jul 27;7(2):2053951720939236. doi: 10.1177/2053951720939236 (PMC7387849; doi:10.1177/2053951720939236), 2020-07-27
Supplement: sj-pdf-1-bds-10.1177_2053951720939236.pdf [file sj-pdf-1-bds-10.1177_2053951720939236.pdf]

Direct

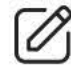

tape\_measures

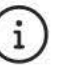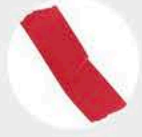

tape\_measures

No worries then, go ahead an... · 10h

Our work will be published in Big Data & Society (<https://journals.sagepub.com/home/bdsa>), an open-access journal focusing on critical data studies. I'm writing to ask if you would kindly grant us permission to include a screenshot of tape\_measures. We will not profit from this publication, so we'd be greatly appreciative if you could please grant us permission to use your work for free or for a nominal fee. Please also let us know how you'd like to be credited. Thank you for your consideration. Regards,

**Words In Space**

Latest Publication: "Andrew Cuomo's COVID-19 Briefings Draw on the Persuasive Authority of PowerPoint," Art in America (April 13, 2020)

Shannon Mattern

Hi Shannon, no worries, feel free to use a screenshot. Do you mean a screenshot of the account or a specific picture? If it's the latter, I'll need to ask the individual photographer(s)

If you're just showing an overview of the main account, you can credit Berny Tan.

10:17 AM

Thank you very much! I was hoping to show a screenshot of the account -- to give a sense of the variety of "tape architectures" we find in the material environment. I appreciate your generosity!

12:01 PM

No worries then, go ahead and use it!

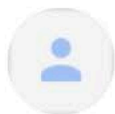

**Salathé Marcel**

4:58 PM (1 minute ago)

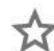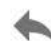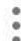

to me, n@ncase.me ▾

Hi Emily - of course! It's all public domain.

Very best,

Marcel

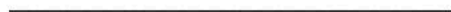

Prof. Marcel Salathé

School of Life Sciences, School of Computer and Communication Sciences

Digital Epidemiology Lab

Academic Director, EPFL Extension School

EPFL

[www.digitalepidemiologylab.org](http://www.digitalepidemiologylab.org)

[www.extensionschool.ch](http://www.extensionschool.ch)

[www.appliedMLdays.org](http://www.appliedMLdays.org)

Twitter: @marcelsalathe

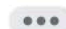

Re: Emily Bowe - Something else!  Inbox x

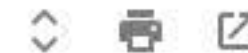

**Maya Emmons-Bell**

to Emily ▾

2:16 PM (59 minutes ago)

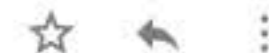

Hi Emily,

That's fine with us! Good luck with your article, and feel free to share it with us when it's published; we'd love to see it!

Best,

—  
Maya Emmons-Bell

Sent from [Front](#)

On May 14, 2020, 1:59 PM PDT [ebowe@newschool.edu](mailto:ebowe@newschool.edu) wrote:

Hello,

I'm Emily Bowe, a graduate student in Urban Studies at The New School. I'm writing because I'm co-authoring an article on COVID-19 data visualizations, and my colleagues and I would like to feature your "The COVID Racial Data Tracker" piece in our publication. Specifically, we'd like to include screenshots of the COVIDvRace Dashboard and the StateGrades pages.

The article, which I'm writing with Erin Simmons, a fellow graduate student, and Shannon Mattern, a Professor of Anthropology, will appear later this month in a special online collection of Big Data & Society, one of the premier open-access, peer-reviewed academic journals in critical data studies.

We will receive no compensation for the piece. Fair Use guidelines cover screenshots of websites, but we wanted to reach out to get permission just to cover our bases as well. Please let us know, too, how you'd like to be credited, and if there's any particular information you'd like us to include in the caption.

Thank you very much for your consideration.

Emily Bowe

- reason: Something else!

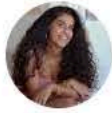

**Mona Chalabi**

to me ▾

Hi Erin,

Thanks for getting in touch - you can find the images [here](#).

All the best,

Mona

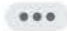

*There are more important things going on right now than whatever I have written above. Please feel free to ignore this message if you need to take care of a living thing instead (you are a living thing).*

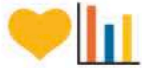

[www.monachalabi.com](http://www.monachalabi.com)

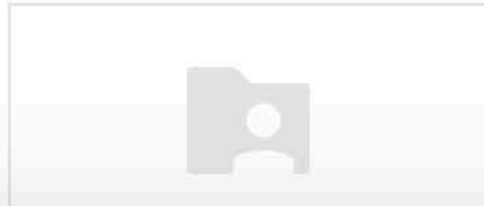

Tue, May 12, 2:11 PM (2 days ago)

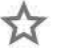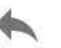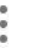

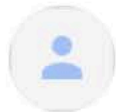

**Ruth Baldwin**

to me ▾

Thu, May 14, 10:08 PM (10 hours ago)

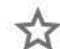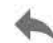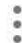

Dear Emily,

Thanks for reaching out and good luck on your project.

It's fine for you to use these images . . . please just credit us along the graphics.

My best

Ruth

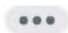

--

Ruth Baldwin

Director of Strategy and Communications

The Marshall Project

156 West 56th Street

Suite 701

New York, NY 10019

tel: [\(212\) 803-5270](tel:(212)803-5270)

fax: [\(212\) 803-5201](tel:(212)803-5201)

<https://www.themarshallproject.org>

Follow us at @MarshallProj

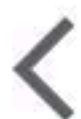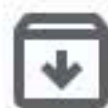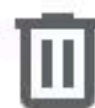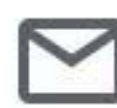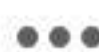

ERIN SIMMONS

MA CANDIDATE

THE NEW SCHOOL FOR SOCIAL RESEARCH

DEPARTMENT OF ANTHROPOLOGY

PRONOUNS: SHE/HER

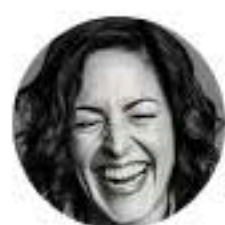**Wendy MacNaughton** 11:18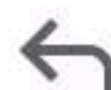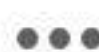

to me ▾

Hey Erin, sure sounds great. Please credit both Eli and I in the article, and list our titles as listed in the artwork. Pls send a link when your article is published. Sounds fascinating! I'll send you the hi res shortly

W

Wendy MacNaughton dot com!

On May 13, 2020, at 1:48 PM, Erin Simmons

<[simme076@newschool.edu](mailto:simme076@newschool.edu)>

wrote:

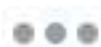

Reply

Forward
