# Supplementary material for: Learning from lines: Critical COVID data visualizations and the quarantine quotidian
Source: PubMed Central journal article supplement — Big Data Soc. 2020 Jul 27;7(2):2053951720939236. doi: 10.1177/2053951720939236 (PMC7387849; doi:10.1177/2053951720939236), 2020-07-27
Supplement: sj-pdf-2-bds-10.1177_2053951720939236.pdf [file sj-pdf-2-bds-10.1177_2053951720939236.pdf]

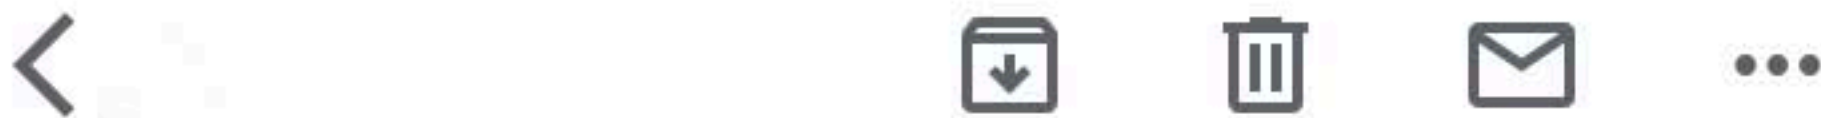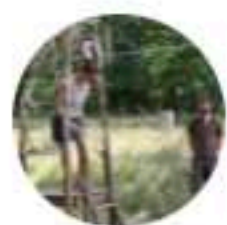

Ellie Irons May 21

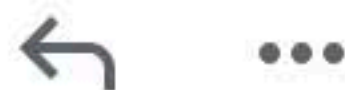

to me, environmental, Christoph... ▾

Hi Erin,

Sorry for the delay. If it's not too late, yes, please use the screenshot. Image caption below!

Multispecies Care Survey, 2020  
A project of The Environmental Performance Agency  
<http://multispecies.care>

Best,

-Ellie

On May 13, 2020, at 9:22 PM, Ellie Irons <[ellieirons@gmail.com](mailto:ellieirons@gmail.com)> wrote:

Hello Erin,

Thanks for getting in touch. I'm just checking in with the group and will get back to you soon! (By the way I
