# Supplementary material for: Learning from lines: Critical COVID data visualizations and the quarantine quotidian
Source: PubMed Central journal article supplement — Big Data Soc. 2020 Jul 27;7(2):2053951720939236. doi: 10.1177/2053951720939236 (PMC7387849; doi:10.1177/2053951720939236), 2020-07-27
Supplement: sj-pdf-3-bds-10.1177_2053951720939236.pdf [file sj-pdf-3-bds-10.1177_2053951720939236.pdf]

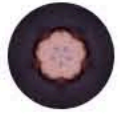

**Renee Jaworski**

to me ▾

Mon, May 18, 5:42 PM (2 days ago)

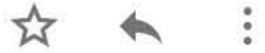

Erin,

Here are the high res images of the shot you sent:

[https://drive.google.com/file/d/1O-INGV3W\\_CeEeRk7eoqZn9Lcn21MNL3a/view?usp=sharing](https://drive.google.com/file/d/1O-INGV3W_CeEeRk7eoqZn9Lcn21MNL3a/view?usp=sharing)

We also have this:

<https://drive.google.com/file/d/1XTgCi2yHx0rq7zm8TxgQx39c9HcZvcQu/view?usp=sharing>

Which is the cover image of the website.

Feel free to use both. Glad to be part of your paper.

Not sure if anyone asked this already but....Would you be able to share the final paper with us?

**Renée Jaworski**

she/her

Artistic Director

Pilobolus

O: [860 868 0538 ext 1](tel:8608680538)

M: [860 689 3109](tel:8606893109)

[6 Calhoun St. Washington, CT 06794](#)

[P.O. Box 388, Washington, CT 06794](#)
